# Supplementary material for: Ocean deoxygenation and copepods: coping with oxygen minimum zone variability
Source: Copernicus journal article supplement (doi:10.5194/bg-17-2315-2020), 2020-04-24

Supplement of Biogeosciences, 17, 2315–2339, 2020  
<https://doi.org/10.5194/bg-17-2315-2020-supplement>  
© Author(s) 2020. This work is distributed under  
the Creative Commons Attribution 4.0 License.

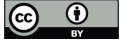

*Supplement of*

## **Ocean deoxygenation and copepods: coping with oxygen minimum zone variability**

**Karen F. Wishner et al.**

*Correspondence to:* Karen F. Wishner ([kwishner@uri.edu](mailto:kwishner@uri.edu))

The copyright of individual parts of the supplement might differ from the CC BY 4.0 License.

**Figure S1: Oxygen profile variability.** All oxygen profiles at each station are shown for the vertically-stratified MOCNESS tows used for zooplankton distributions discussed in this paper. These are from the upcast portion of the tow during zooplankton sampling. In some cases, portions of tows were not available because of sensor issues.

**Table S1:** Details for each net in a tow including depth range and volume filtered, followed by abundances in each net (number (1000 m)<sup>-3</sup>) for each of the species considered in this paper (Wishner et al., 2019, <https://digitalcommons.uri.edu/gso-data/1/>). Species names are shortened; full names are in Table 2. For the net ID, the first three digits are the tow number and the fourth digit is the net number. Most abundances are for adults only (males and females). For some species, younger life stages are also shown. C = copepodite for the listed stage number, M= male, F=female.

Wishner, K. F., Seibel, B., Outram, D.: Supplementary Table S1 for Ocean deoxygenation and copepods: Coping with oxygen minimum zone variability, <https://digitalcommons.uri.edu/gso-data/1/> 2019.

Supplementary Figure S1

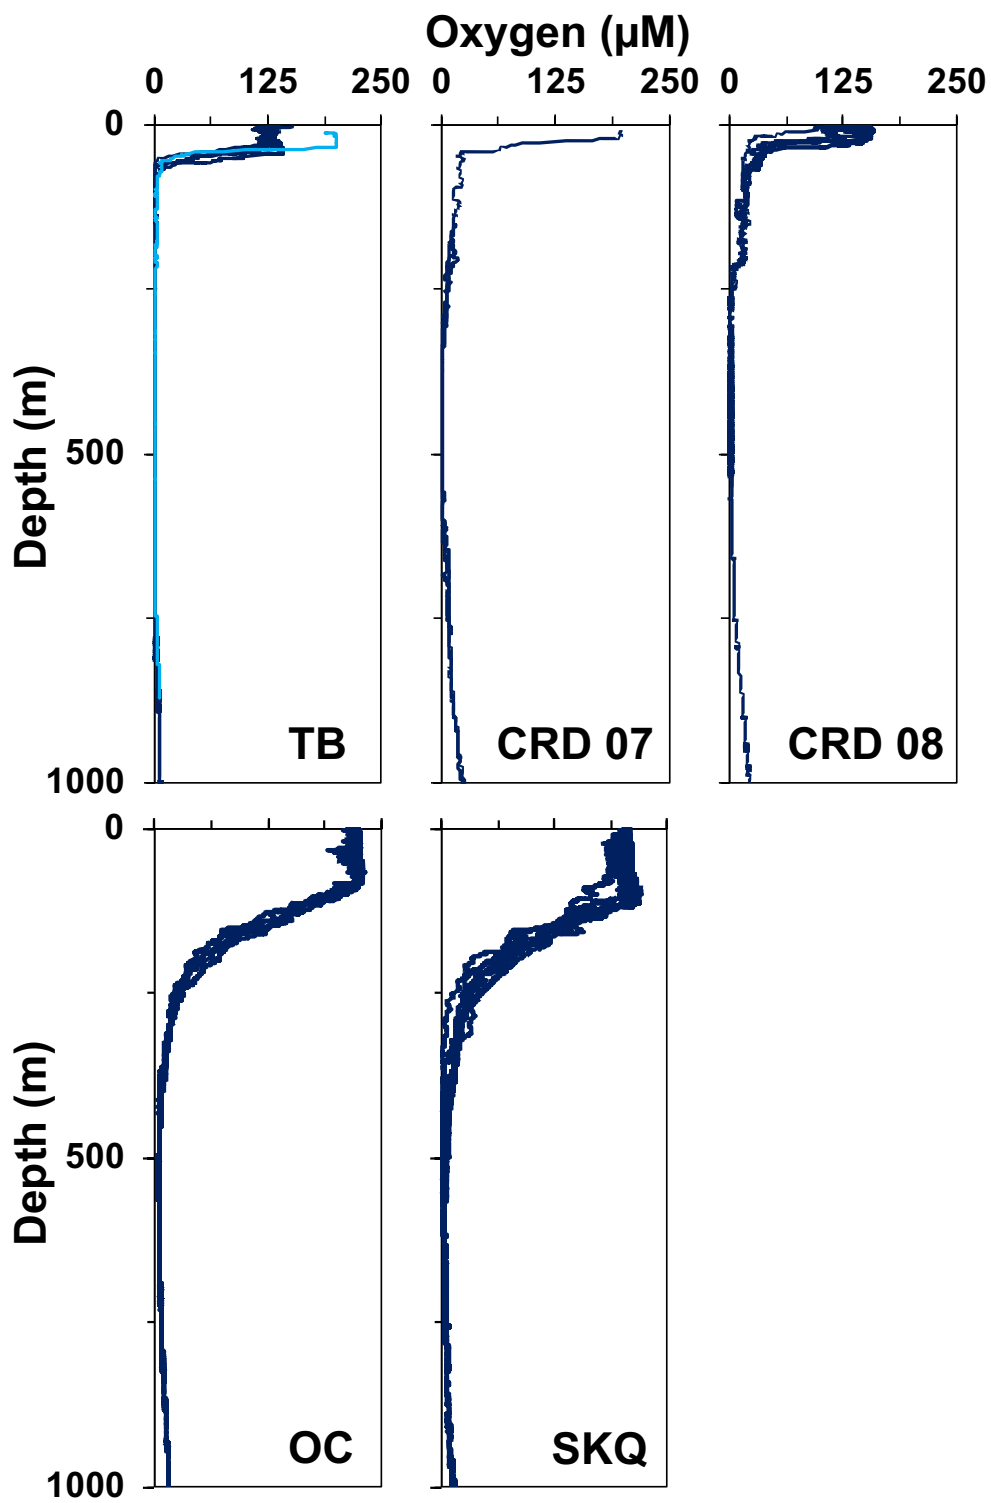

Supplement: Supplementary file 1 [file bg-17-2315-2020-supplement.pdf]
